# Supplementary material
Source: PubMed Central journal article supplement (PMC4805508)
Supplement: NIHMS761993-supplement-1.pdf [file NIHMS761993-supplement-1.pdf]

## **Inventory of Supplemental Information**

### **I. Supplemental Figures**

Figure S1, related to Figures 1, 2 and 3

Figure S2, related to Figures 2 and 3

Figure S3, related to Figure 5

Figure S4, related to Figures, 2, 6 and 7

Figure S5, related to Figures 4, 5 and 6

Figure S6, related to Figure 7

Figure S7, related to Figure 7

### **II. Supplemental Figure Legends**

### **III. Supplemental Tables**

Tables S1, S2, S3 and S4, related to Figure 5.

### **IV. Supplemental Experimental Procedures and References**
